# Supplementary material
Source: PubMed Central journal article supplement (PMC6102711)

# Supplementary figure 1

## A Bimodal rFN neuron

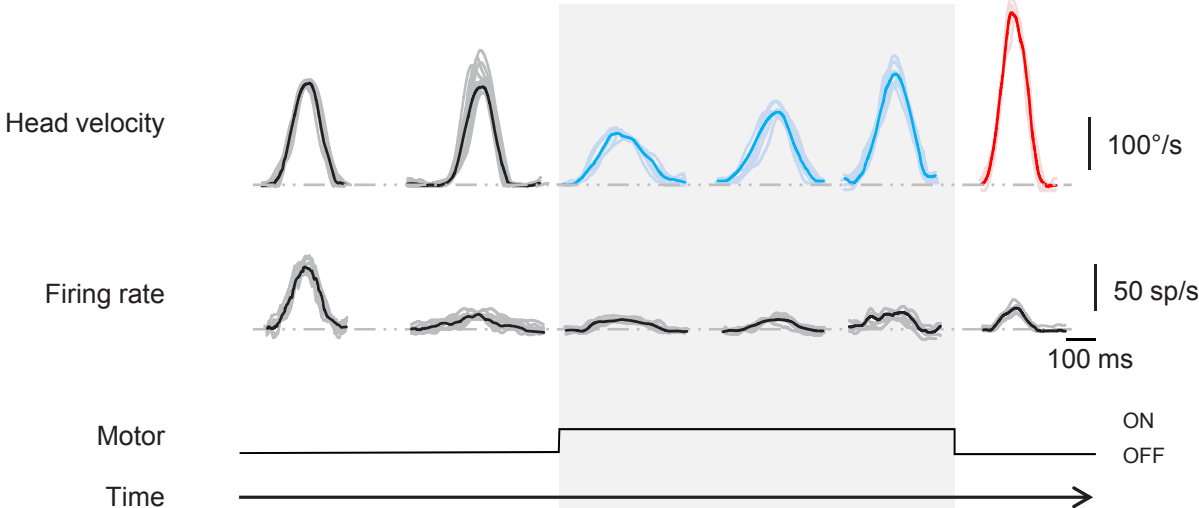

## B

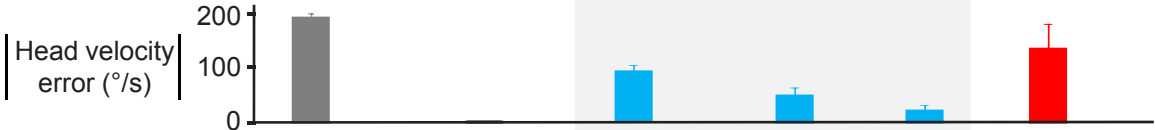

## C

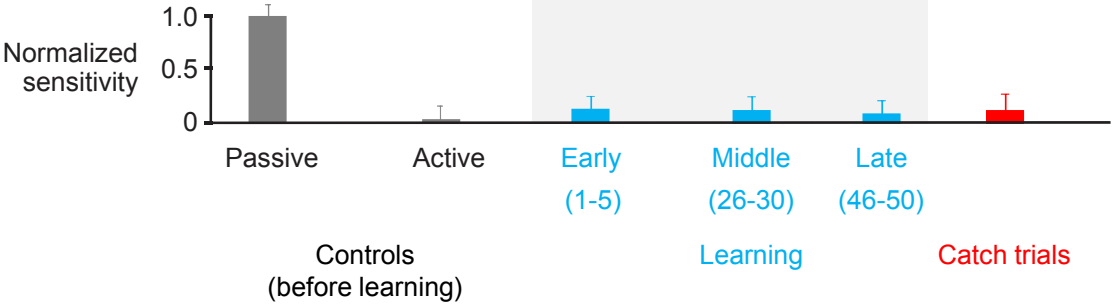

# Supplementary figure 2

## Bimodal rFN neuron

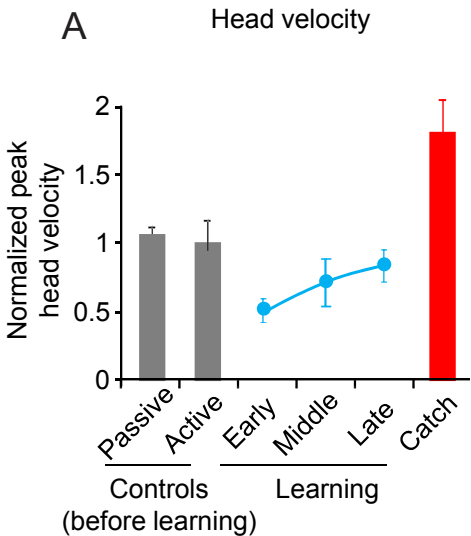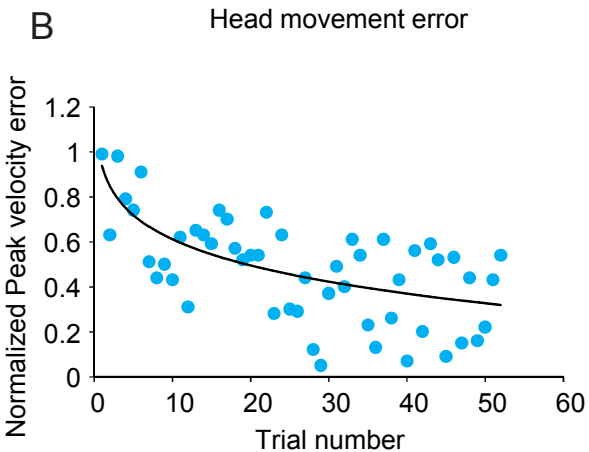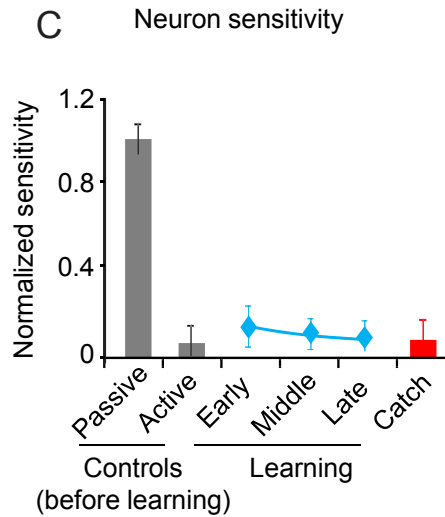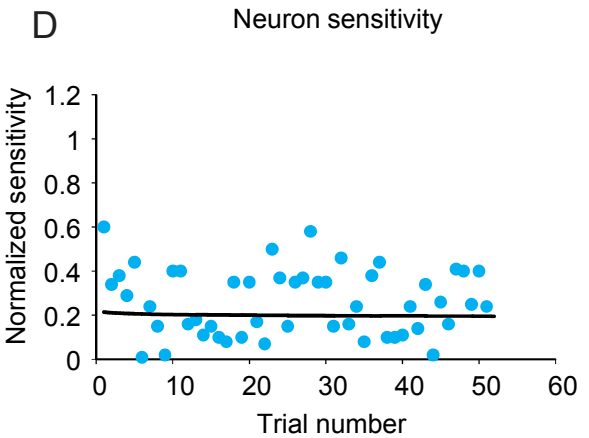

# Supplementary figure 3

## Learning

## Extinction

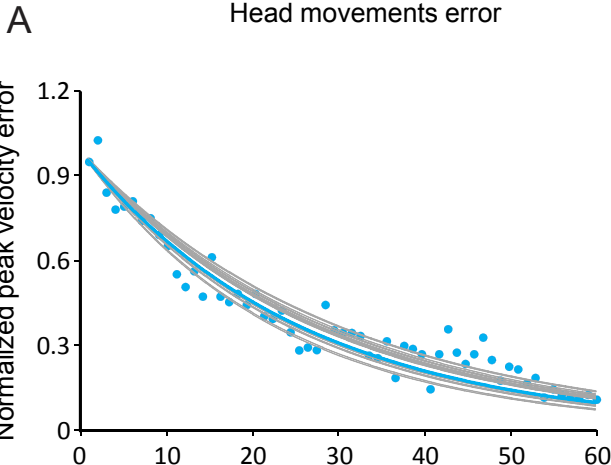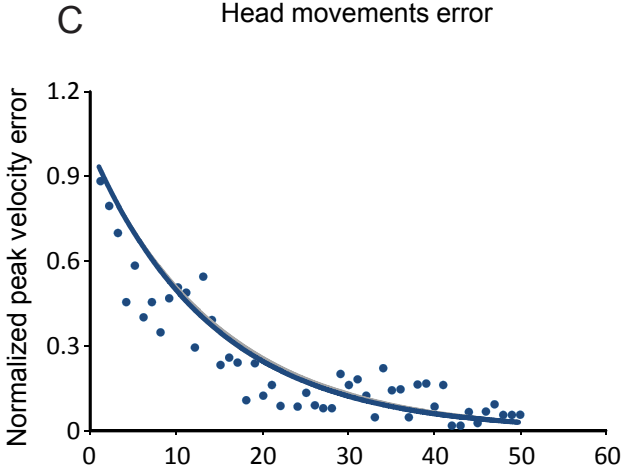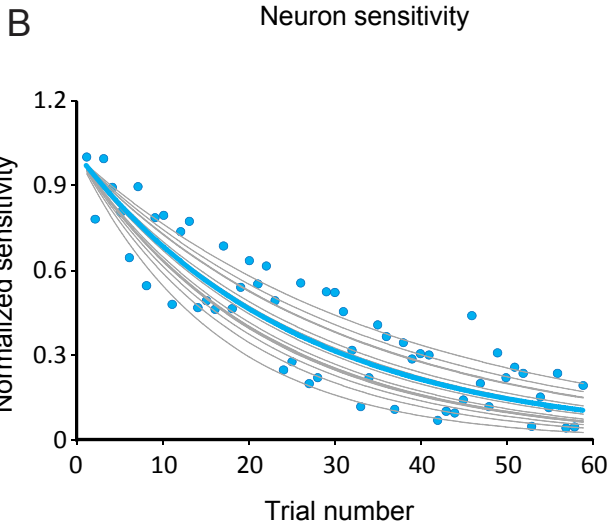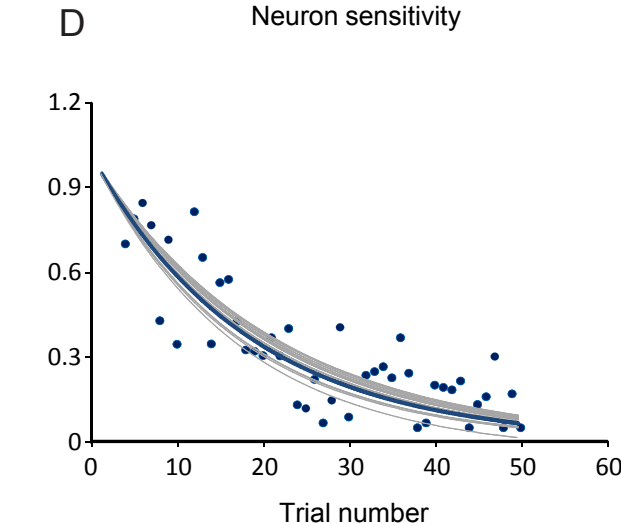

# Supplementary figure 4

## Bimodal rFN neuron

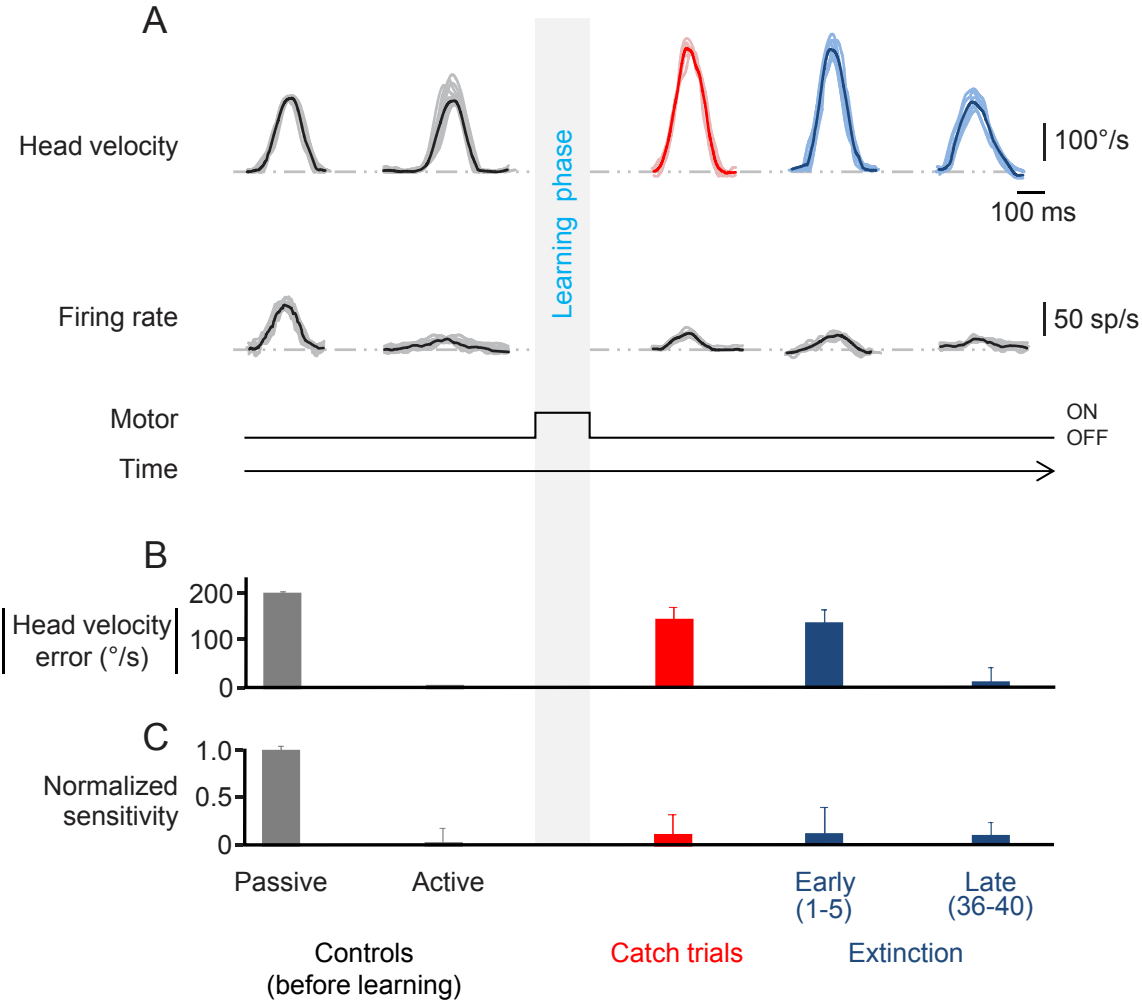

# Supplementary figure 5

## Bimodal rFN neuron

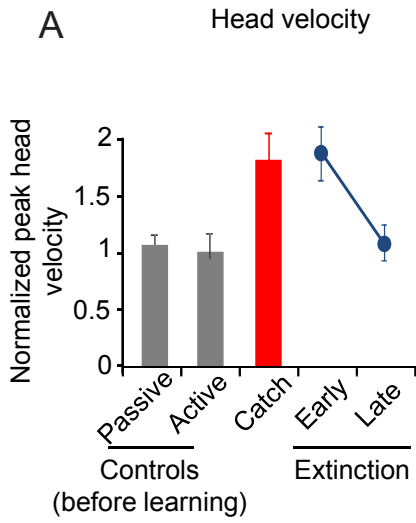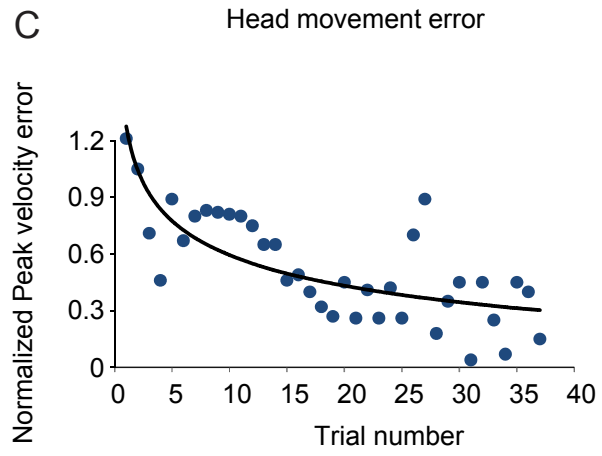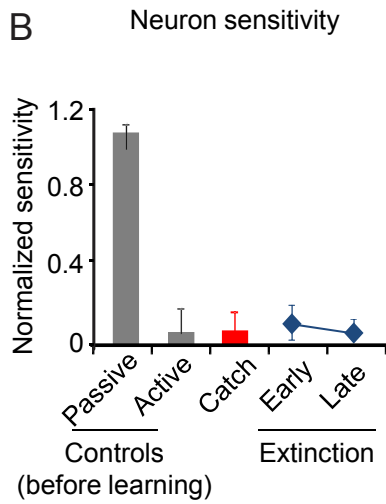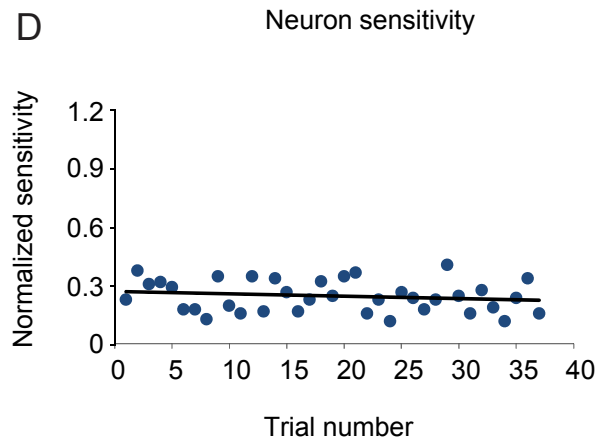

# Supplementary figure 6

## Learning

## Extinction

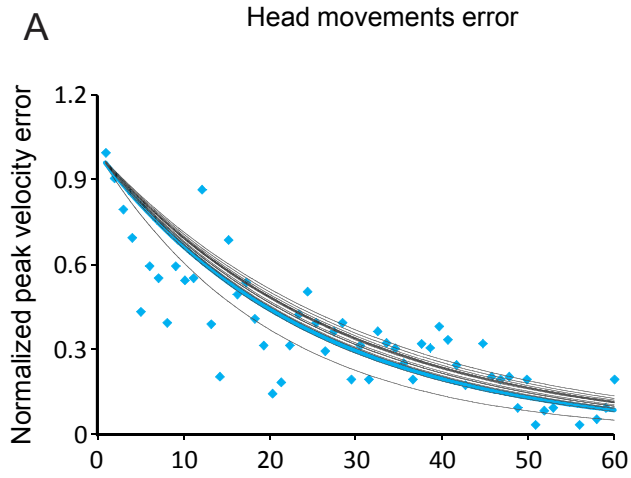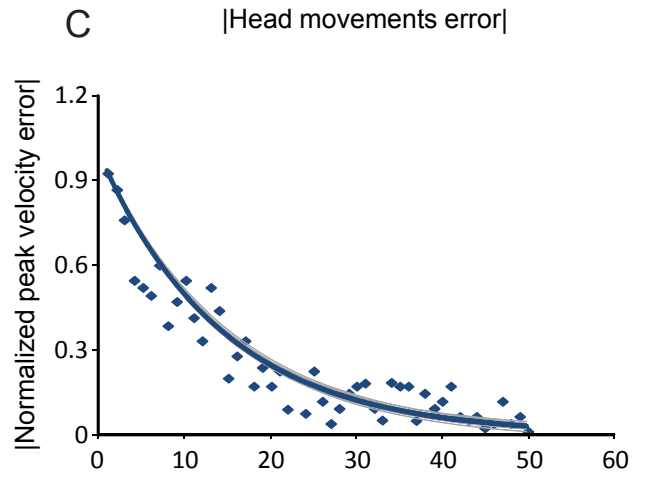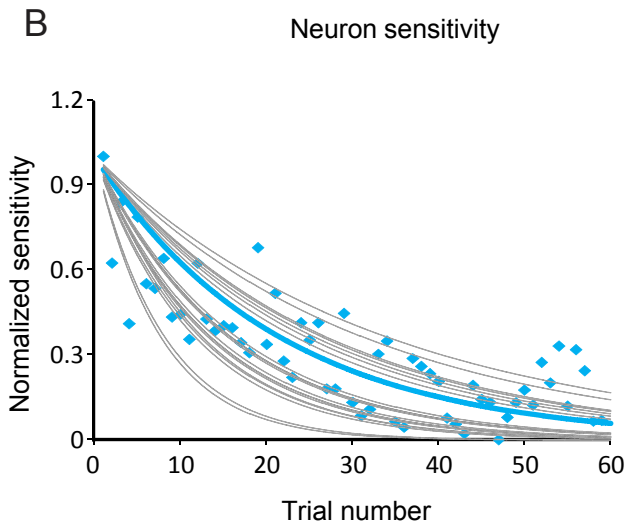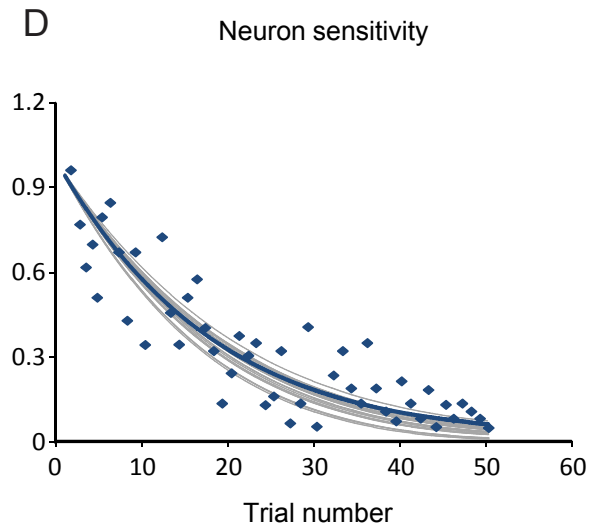

Supplement: NIHMS985015-supplement-1.pdf [file NIHMS985015-supplement-1.pdf]
